# Supplementary material
Source: PubMed Central journal article supplement (PMC9426863)

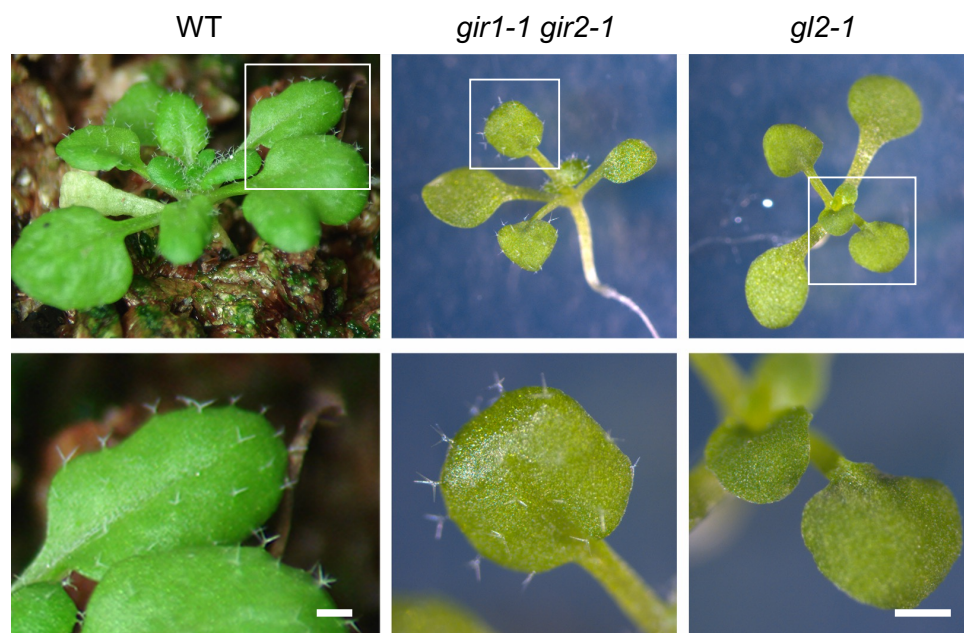

Fig. S1

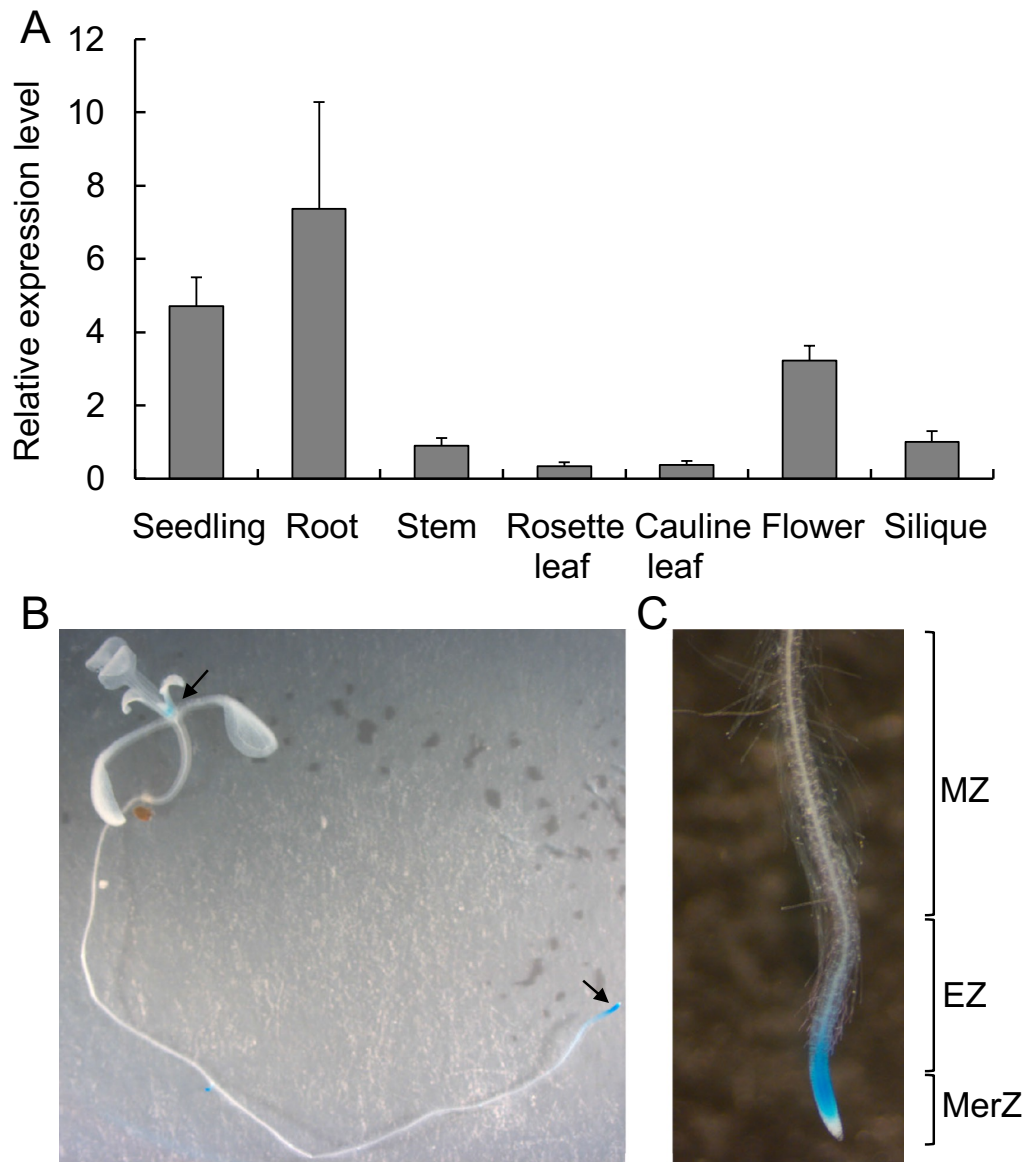

Fig. S2

Supplement: NIHMS1831589-supplement-Figs_S1__S2.pdf [file NIHMS1831589-supplement-Figs_S1__S2.pdf]
